# Supplementary material for: Ingestion of Soybean Sprouts Containing a HASPIN Inhibitor Improves Condition in a Mouse Model of Alzheimer’s Disease
Source: MDPI journal article supplement (doi:10.3390/biology12020320), 2023-02-16
Supplement: s1 [file s1]

**Table S1** Effects of diets on body weights.

| Diets  | Standard diet | Soybean sprouts*  |
|--------|---------------|-------------------|
| Male   | 27.8±0.9      | 25.6±1.0 (0.0001) |
| Female | 23.1±0.6      | 22.6±1.5 (0.73)   |

\*Soybean sprouts means the diet including soybean sprout.

Six individuals were measured for each.

The numbers of in parentheses indicated *p* values in a standard diet and the diet including soybean sprout.
